# Supplementary material for: Ciliary transport regulates PDGF-AA/αα signaling via elevated mammalian target of rapamycin signaling and diminished PP2A activity
Source: PubMed Central journal article supplement — Mol Biol Cell. 2015 Jan 15;26(2):350–8. doi: 10.1091/mbc.E14-05-0952 (PMC4294681; doi:10.1091/mbc.e14-05-0952), 2015-01-15
Supplement: supp_E14-05-0952_CombinedSupMats.pdf [file supp_E14-05-0952_CombinedSupMats.pdf]

# Supplemental Materials

*Molecular Biology of the Cell*

Umberger et al.

Figure S1: Quantification of PDGFR $\alpha$ , P-PDGFR $\alpha^{Y742}$ , P-Akt $T308$ , P-Akt $S473$ , and Akt in control and cilia transport mutant MEFs with or without PDGF-AA, with or without rapamycin, or with either LY294002 or OA, or LY294002 and OA. Annotations for statistically significant changes are indicated. Non-significant changes are not indicated, but statistics were performed. Statistical analyses are included in Supplementary Table S1 for S1B-D. ns p>0.05, \* p<0.05, \*\* p<0.01, \*\*\* p<0.001.

A: Average densitometry values of PDGFR $\alpha$ , with and without rapamycin, normalized to a loading control (n=3).

B: Average densitometry values of P-PDGFR $\alpha^{Y742}$  normalized to a loading control (n=3).

C: Average densitometry values of P-Akt $T308$  normalized to a loading control (n=3).

D: Average densitometry values of P-Akt $S473$  normalized to a loading control (n=3).

E: Average densitometry values of Akt normalized to a loading control (n=3).

F: Average densitometry values of Akt normalized to a loading control (n=3).

Figure S2: P-Akt $T308$  localization in control and cilia transport mutant MEFs.

Serum starved control and cilia transport mutant MEFs were immunolabeled for P-Akt $T308$  (green) and for the basal body using  $\gamma$ -tubulin (red).

Figure S3: Response of control and *Dync2h1<sup>ln</sup>* MEFs grown in 0.5% serum to multiple treatments

A: Control and *Dync2h1<sup>ln</sup>* MEFs grown in 0.5% serum were lysed and processed for Western blot analysis of P-Akt $T308$  under the indicated conditions (no serum, +LY294002, +okadaic acid, +okadaic acid +LY294002, and +rapamycin). Lanes shown are re-arranged from a single gel.

B: Control and *Dync2h1<sup>ln</sup>* MEFs grown in 0.5% serum were immunolabeled for the catalytic subunit of PP2A, PP2Ac, and for the basal body using  $\gamma$ -tubulin

C: Control and *Dync2h1<sup>ln</sup>* MEFs grown in 0.5% serum were lysed and processed for Western blot analysis of phosphorylated mTOR (P-mTOR $S2448$ ), p70 S6K (P-p70 S6K $T389$ ), and S6 (S6 $S235/236$ ). Lanes shown are re-arranged from a single gel.

D: Comparison of PDGFR $\alpha$ , P-PDGFR $\alpha^{Y742}$ , P-Akt $T308$ , and P-Akt $S473$  in Control and *Dync2h1<sup>ln</sup>* MEFs grown in 0.5% serum with or without stimulation with PDGF-AA ligand. Lanes shown are re-arranged from a single gel.

Figure S4: Absence of cilia in serum-starve *Ift172<sup>wim</sup>* MEFs without and with rapamycin treatment and inhibition of mTORC1 signaling by rapamycin treatment.

A: Serum starved control MEFs were immunolabeled for PDGFR $\alpha$  (green) and for cilia using Arl13b (red).

B: Serum starved *Ift172<sup>wim</sup>* MEFs were immunolabeled for PDGFR $\alpha$  (green) and for the basal body using  $\gamma$ -tubulin (red).

C: Serum starved and rapamycin treated *Ift172<sup>wim</sup>* MEFs were immunolabeled for PDGFR $\alpha$  (green) and for cilia using Arl13b (red).

D: Rapamycin treatment inhibits phosphorylation of p70 S6K $T389$  in control and cilia transport mutant MEFs, with or without PDGF-AA.

Table 1: Statistical analysis of Western blot band intensities were carried out using Microsoft Excel. The significance values (compared to respective controls) were calculated using a two-tailed unpaired *t* test with a 95% confidence interval.  
-P: No PDGF-AA. +P: With PDGF-AA. +R: With rapamycin.

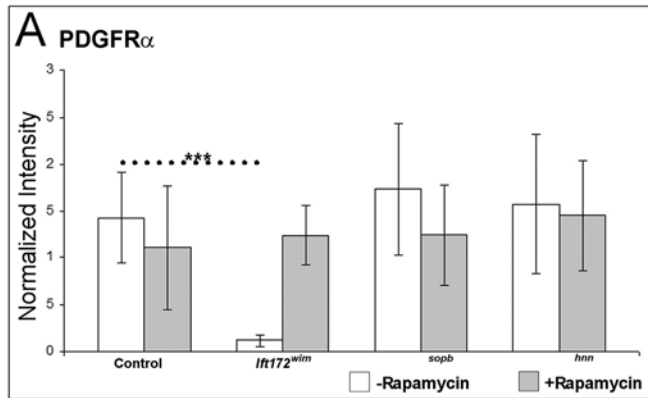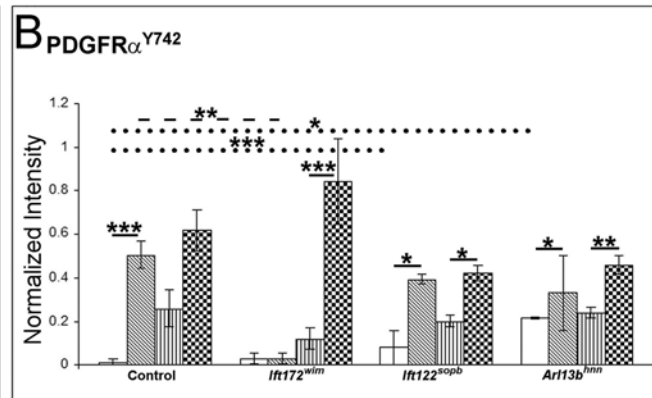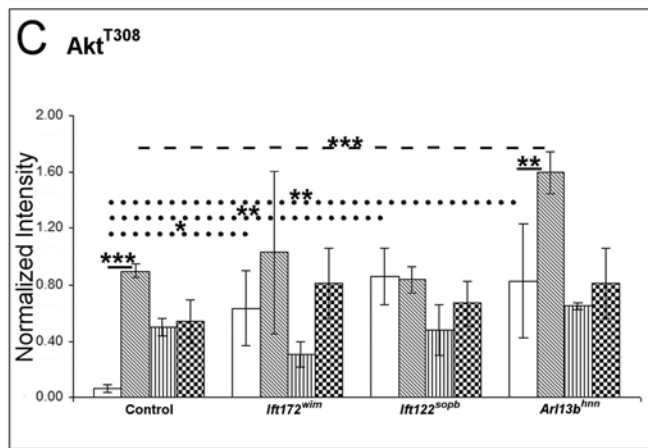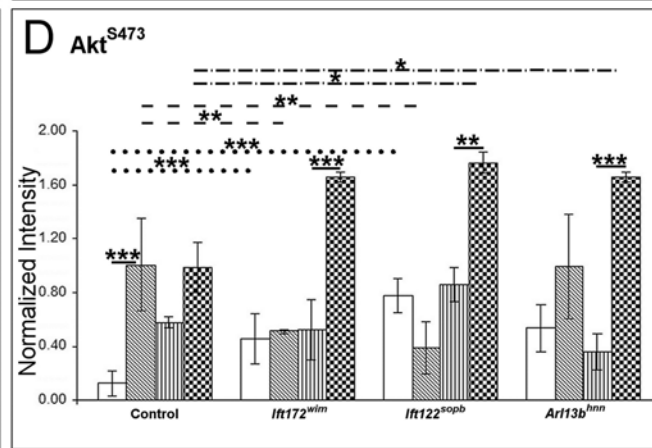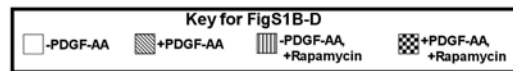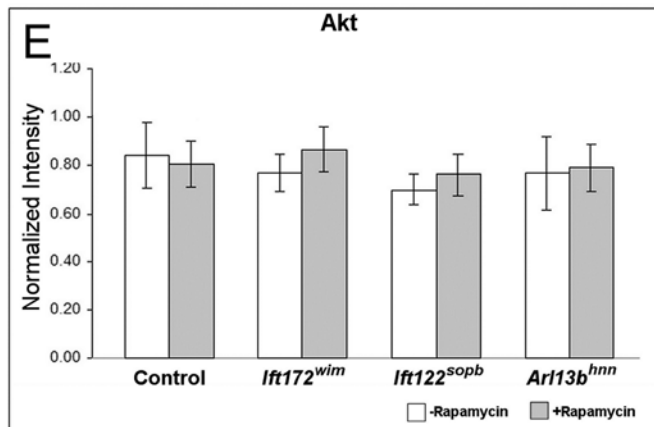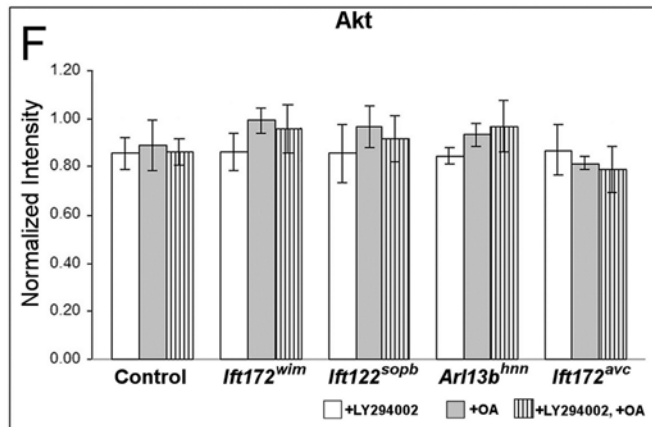

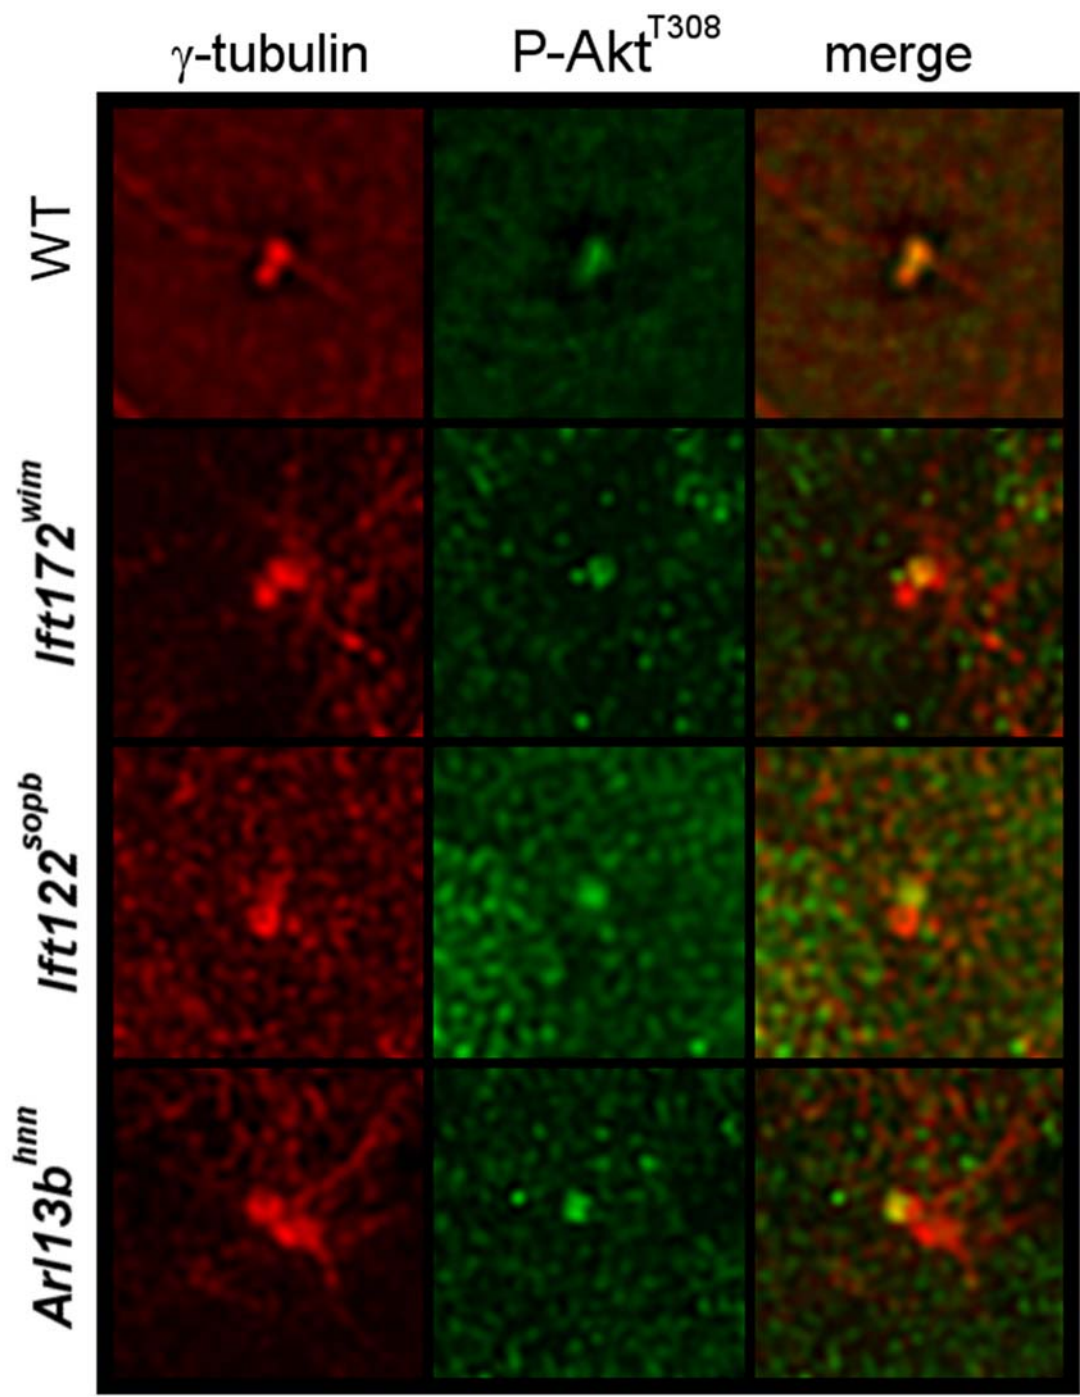

**A**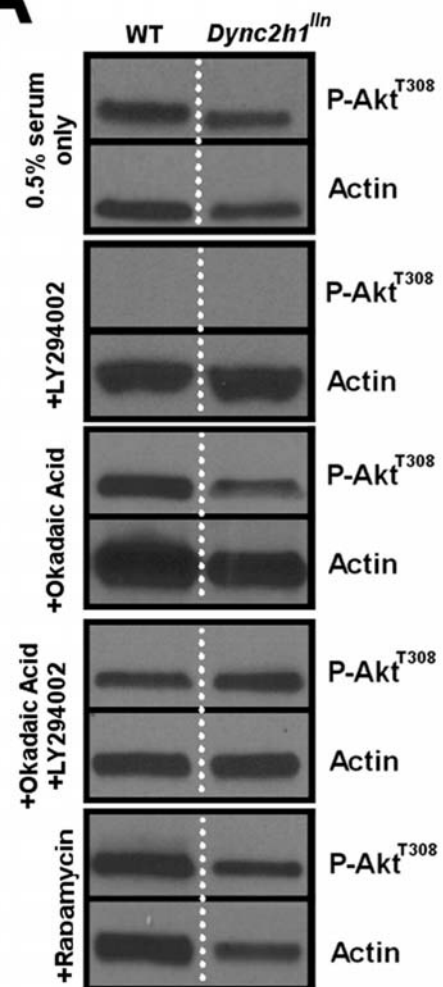**B**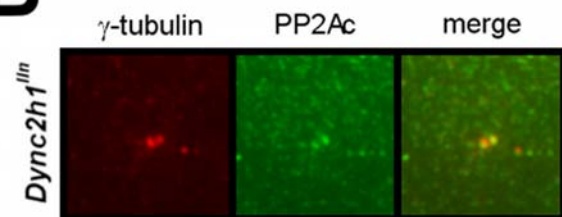**C**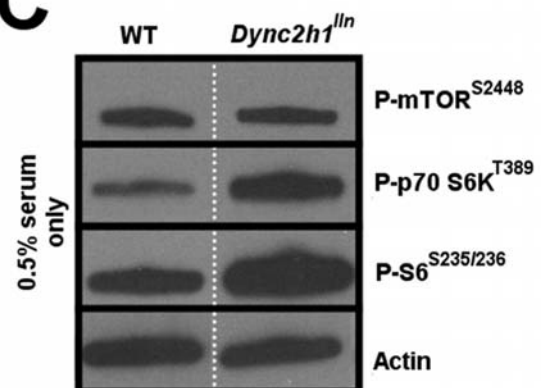**D**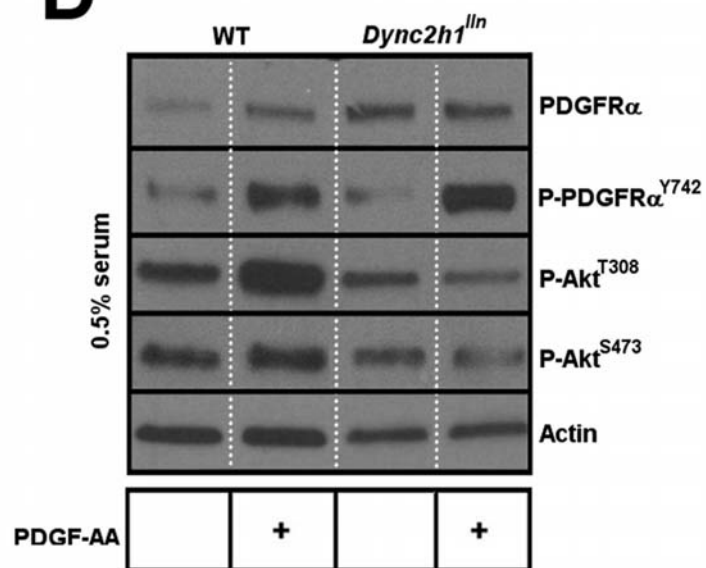

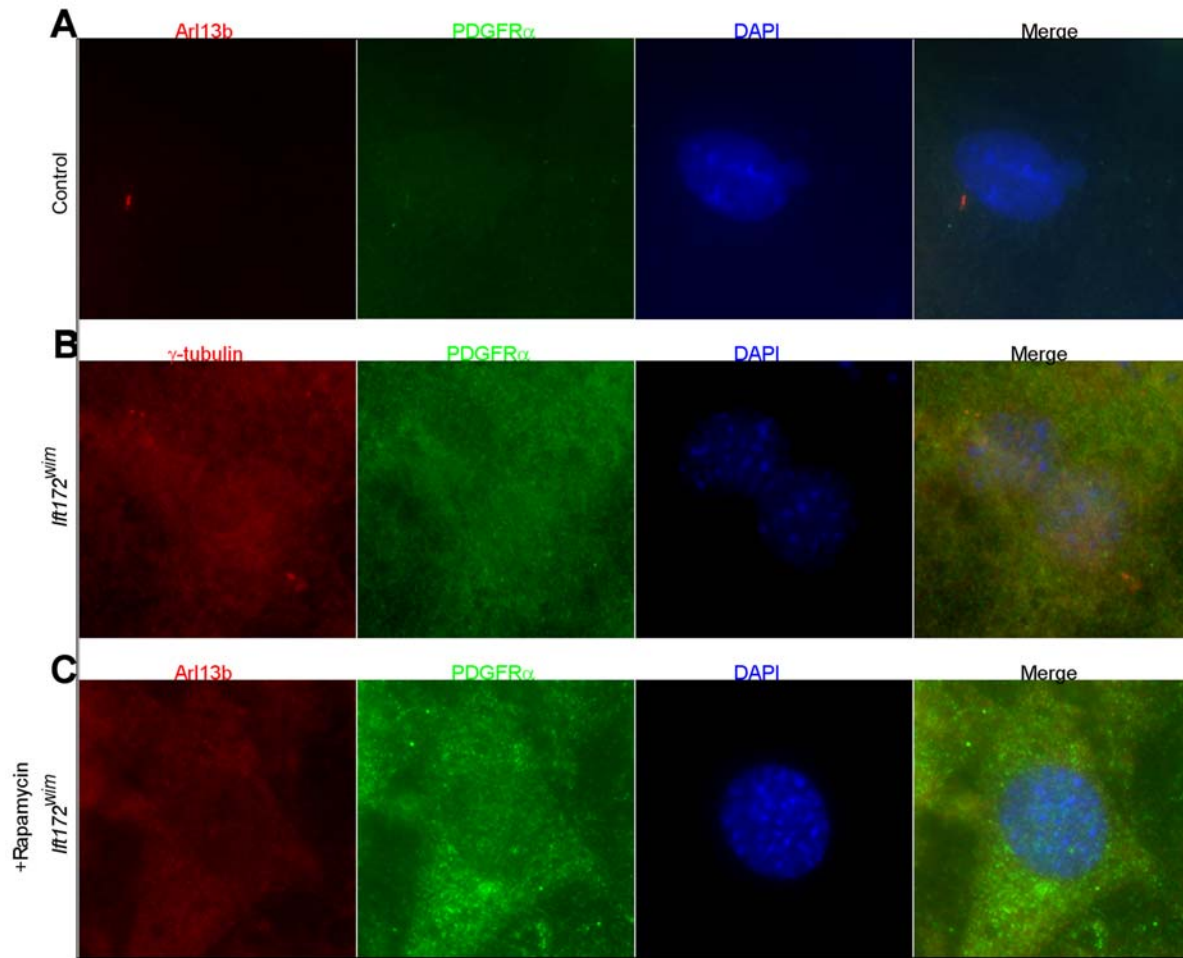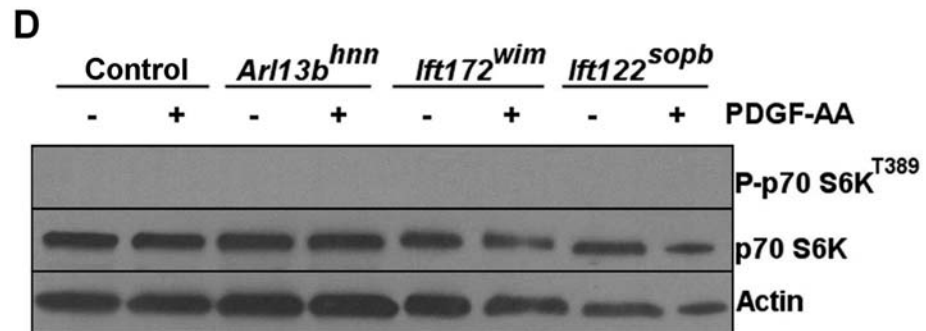

Table 1

| P-values                           |                             |                             |                                                  |
|------------------------------------|-----------------------------|-----------------------------|--------------------------------------------------|
| MEFs                               | Proteins                    |                             |                                                  |
|                                    | <b>P-Akt<sup>T308</sup></b> | <b>P-Akt<sup>S473</sup></b> | <b>P-PDGFR<math>\alpha</math><sup>Y742</sup></b> |
| Control -P vs Control +P           | P<0.001                     | P<0.001                     | P<0.001                                          |
| Control -P vs <i>wim</i> -P        | P<0.05                      | P<0.001                     | P>0.05 (ns)                                      |
| Control -P vs <i>sopb</i> -P       | P<0.001                     | P<0.001                     | P<0.001                                          |
| Control -P vs <i>hnn</i> -P        | P<0.001                     | P>0.05 (ns)                 | P<0.05                                           |
| Control +P vs <i>wim</i> +P        | P>0.05 (ns)                 | P<0.01                      | P<0.01                                           |
| Control +P vs <i>sopb</i> +P       | P>0.05 (ns)                 | P<0.01                      | P>0.05 (ns)                                      |
| Control +P vs <i>hnn</i> +P        | P<0.001                     | P>0.05 (ns)                 | P>0.05 (ns)                                      |
|                                    | <b>P-Akt<sup>T308</sup></b> | <b>P-Akt<sup>S473</sup></b> | <b>P-PDGFR<math>\alpha</math><sup>Y742</sup></b> |
| Control +R vs Control +R+P         | P>0.05 (ns)                 | P>0.05 (ns)                 | P>0.05 (ns)                                      |
| Control +R vs <i>wim</i> +R        | P>0.05 (ns)                 | P>0.05 (ns)                 | P>0.05 (ns)                                      |
| Control +R vs <i>sopb</i> +R       | P>0.05 (ns)                 | P>0.05 (ns)                 | P>0.05 (ns)                                      |
| Control +R vs <i>hnn</i> +R        | P>0.05 (ns)                 | P>0.05 (ns)                 | P>0.05 (ns)                                      |
| Control +R+P vs <i>wim</i> +R+P    | P>0.05 (ns)                 | P>0.05 (ns)                 | P>0.05 (ns)                                      |
| Control +R+P vs <i>sopb</i> +R+P   | P>0.05 (ns)                 | P<0.05                      | P>0.05 (ns)                                      |
| Control +R+P vs <i>hnn</i> +R+P    | P>0.05 (ns)                 | P<0.05                      | P>0.05 (ns)                                      |
|                                    | <b>P-Akt<sup>T308</sup></b> | <b>P-Akt<sup>S473</sup></b> | <b>P-PDGFR<math>\alpha</math><sup>Y742</sup></b> |
| <i>wim</i> -P vs <i>wim</i> +P     | P>0.05 (ns)                 | P>0.05 (ns)                 | P>0.05 (ns)                                      |
| <i>wim</i> +R vs <i>wim</i> +R+P   | P>0.05 (ns)                 | P<0.001                     | P<0.001                                          |
| <i>wim</i> -P vs <i>wim</i> +R     | P>0.05 (ns)                 | P>0.05 (ns)                 | P>0.05 (ns)                                      |
| <i>sopb</i> -P vs <i>sopb</i> +P   | P>0.05 (ns)                 | P>0.05 (ns)                 | P<0.05                                           |
| <i>sopb</i> +R vs <i>sopb</i> +R+P | P>0.05 (ns)                 | P<0.01                      | P<0.05                                           |
| <i>sopb</i> -P vs <i>sopb</i> +R   | P>0.05 (ns)                 | P>0.05 (ns)                 | P>0.05 (ns)                                      |
| <i>hnn</i> -P vs <i>hnn</i> +P     | P<0.01                      | P<0.001                     | P<0.05                                           |
| <i>hnn</i> +R vs <i>hnn</i> +R+P   | P>0.05 (ns)                 | P>0.05 (ns)                 | P<0.01                                           |
| <i>hnn</i> -P vs <i>hnn</i> +R     | P<0.05                      | P<0.05                      | P>0.05 (ns)                                      |

Table 1: Statistical analysis of Western blot band intensities were carried out using Microsoft Excel. The significance values (compared to respective controls) were calculated using a two-tailed unpaired *t*-test with a 95% confidence interval.

-P: No PDGF-AA. +P: With PDGF-AA. +R: With rapamycin.
